# Supplementary material
Source: MDPI journal article supplement (https://www.mdpi.com/2073-4344/12/8/910)
Supplement: s1 [file s1]

## Supplementary information

# Hollow $\text{CuFe}_2\text{O}_4/\text{MgFe}_2\text{O}_4$ Heterojunction Boost Photocatalytic Oxidation Activity for Organic Pollutants

Zhicheng Zhang <sup>1</sup>, Wei Cai <sup>1</sup>, Shaopeng Rong <sup>2</sup>, Hongxia Qu <sup>1,\*</sup> and Huifang Xie <sup>2,\*</sup>

<sup>1</sup> Department of Chemical Engineering and Technology, School of Chemistry and Chemical Engineering, Nanjing University of Science and Technology, Nanjing 210094, China

<sup>2</sup> Department of Environmental Science and Technology, School of Environmental and Biological Engineering, Nanjing University of Science and Technology, Nanjing 210094, China

\* Correspondence: qhx@mail.njust.edu.cn (H.Q.); huifangxie@hotmail.com (H.X.)

### Materials

Ferric chloride ( $\text{FeCl}_3 \cdot 6\text{H}_2\text{O}$ ), cupric chloride ( $\text{CuCl}_2 \cdot 2\text{H}_2\text{O}$ ), magnesium chloride ( $\text{MgCl}_2 \cdot 6\text{H}_2\text{O}$ ), ethylene glycol and PEG-20000 were purchased from Sinopharm Chemical Reagent Co., Ltd, China. AO7 (C.I. 15510) from Beijing Chemical Reagents. Nafion solution (5%) was purchased from Shanghai Hesen.

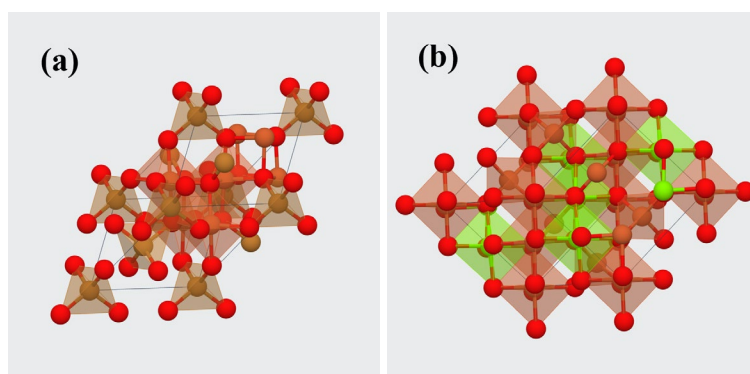

Figure S1(a). The cell structure diagram of  $\text{CuFe}_2\text{O}_4$ , (b).  $\text{MgFe}_2\text{O}_4$ .

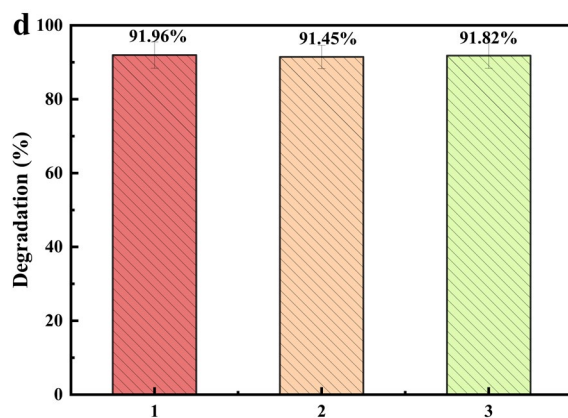

Figure S2. Three photocatalytic degradation tests of (Cu: Mg=1:2) CuFe<sub>2</sub>O<sub>4</sub>/MgFe<sub>2</sub>O<sub>4</sub>

**Table S1.** XPS element mole content diagram of CuFe<sub>2</sub>O<sub>4</sub>/MgFe<sub>2</sub>O<sub>4</sub>

| Different feed ratios | O      | Fe     | Cu    | C      | Mg    | Cu: Mg |
|-----------------------|--------|--------|-------|--------|-------|--------|
| Cu: Mg=1:0.5          | 57.19% | 20.84% | 3.29% | 17.13% | 1.55% | 1:0.47 |
| Cu: Mg=1: 1           | 57.34% | 21.65% | 2.69% | 15.81% | 2.51% | 1:0.93 |
| Cu: Mg=1: 2           | 58.86% | 22.62% | 1.52% | 14.2%  | 2.8%  | 1:1.84 |
| Cu: Mg=1: 3           | 59.12% | 22.67% | 1.39% | 12.97% | 3.85% | 1:2.75 |

**Table S2.** Comparison of different reported photocatalysts for AO<sub>7</sub> degradation

| Catalyst                                                                          | Catalyst concentration (g/L) | Organic dye concentration (ppm) | Degradation efficiency | Ref.      |
|-----------------------------------------------------------------------------------|------------------------------|---------------------------------|------------------------|-----------|
| CuFe <sub>2</sub> O <sub>4</sub> /MgFe <sub>2</sub> O <sub>4</sub>                | 0.8                          | 35                              | 91.96%,1h              | This work |
| N, F-TiO <sub>2</sub>                                                             | 1.0                          | 3.3*10 <sup>3</sup>             | 16%,3h                 | [65]      |
| CoCr-LDH                                                                          | 1.0                          | 3.3*10 <sup>3</sup>             | 90%,3h                 | [66]      |
| CrS-Graphene                                                                      | 0.67                         | 20                              | 97%,4h                 | [67]      |
| Zn <sub>3</sub> Ti <sub>1</sub> -LDO-4                                            | 0.25                         | 20                              | 99.2%,3h               | [68]      |
| BiOBr@Bi-MOF                                                                      | 0.6                          | 20                              | 37.5%,1h               | [69]      |
| Fe <sub>3</sub> O <sub>4</sub> /C/MnO <sub>2</sub> /C <sub>3</sub> N <sub>4</sub> | 0.31                         | 10                              | 94.11%,2.33h           | [70]      |
